# Supplementary material for: An amyloid-like fibril-forming supramolecular cross-β-structure of a model peptide: a crystallographic insight
Source: Royal Society of Chemistry journal article supplement (doi:10.1039/c0ob01033b), 2011-01-01
Supplement: c0ob01033b.pdf [file c0ob01033b.pdf]

## Supporting Information

# An amyloid-like fibril-forming supramolecular cross- $\beta$ -structure of a model peptide: a crystallographic insight

Sibaprasad Maity, Pankaj Kumar and Debasish Haldar\*

Department of Chemical Sciences, Indian Institute of Science Education and Research –Kolkata,  
Mohanpur, West Bengal- 741252, India.

E-mail: [deba\\_h76@yahoo.com](mailto:deba_h76@yahoo.com) ; [deba\\_h76@iiserkol.ac.in](mailto:deba_h76@iiserkol.ac.in)

### Table of contents

|               |   |           |   |
|---------------|---|-----------|---|
| ESI Figure S1 | 2 | Figure S4 | 5 |
| Scheme 1      | 3 | Figure S5 | 5 |
| Figure S2     | 4 | Figure S6 | 6 |
| Figure S3     | 4 |           |   |

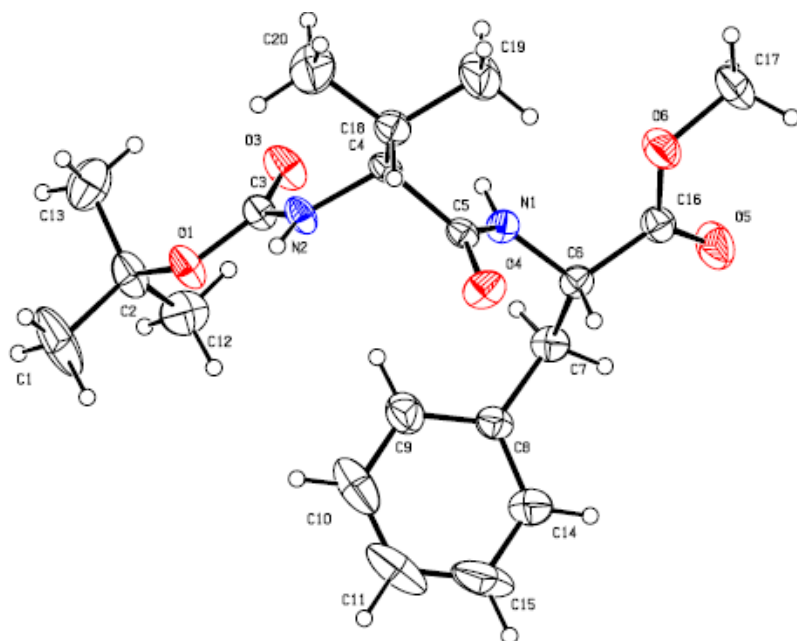

**ESI Figure S1:** The ORTEP diagram of peptide **1** showing the atomic numbering scheme.

Ellipsoids are drawn at the 30% probability level.

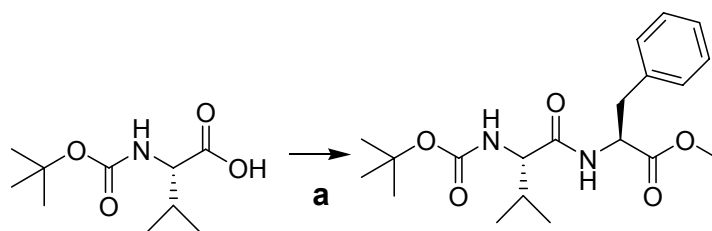

**Scheme 1:** Schematic presentation of synthesis of peptide **1**. Reagents and conditions: a) DCM, H-Phe-OMe, DCC, HOBT, 0°C.

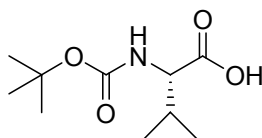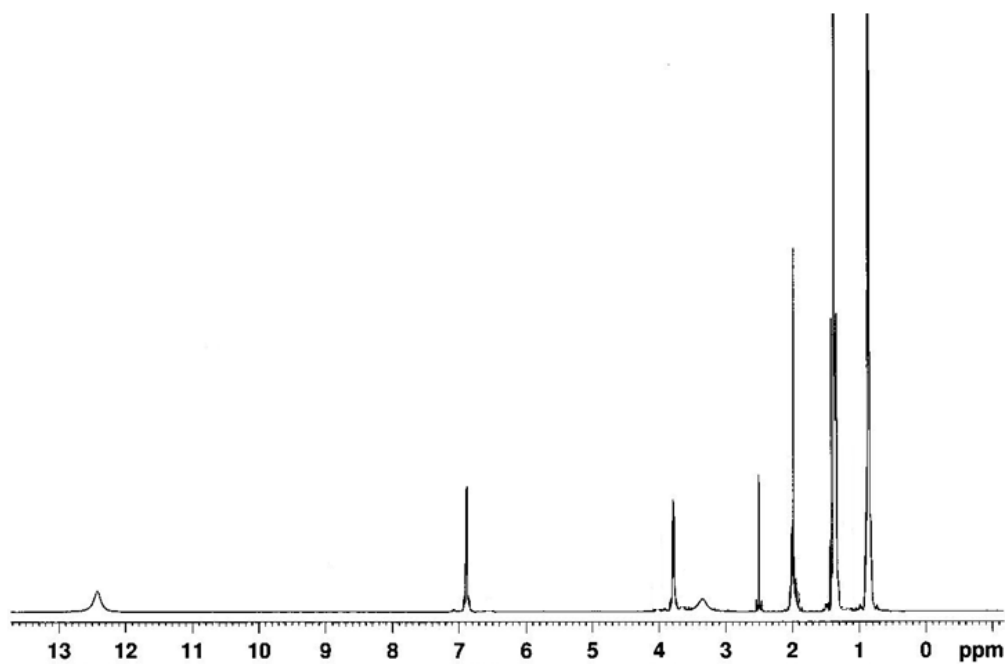

Figure S2:  $^1\text{H}$  NMR (500 MHz,  $\text{DMSO-}d_6$ ) spectra of Boc-Val(1)-OH 2.

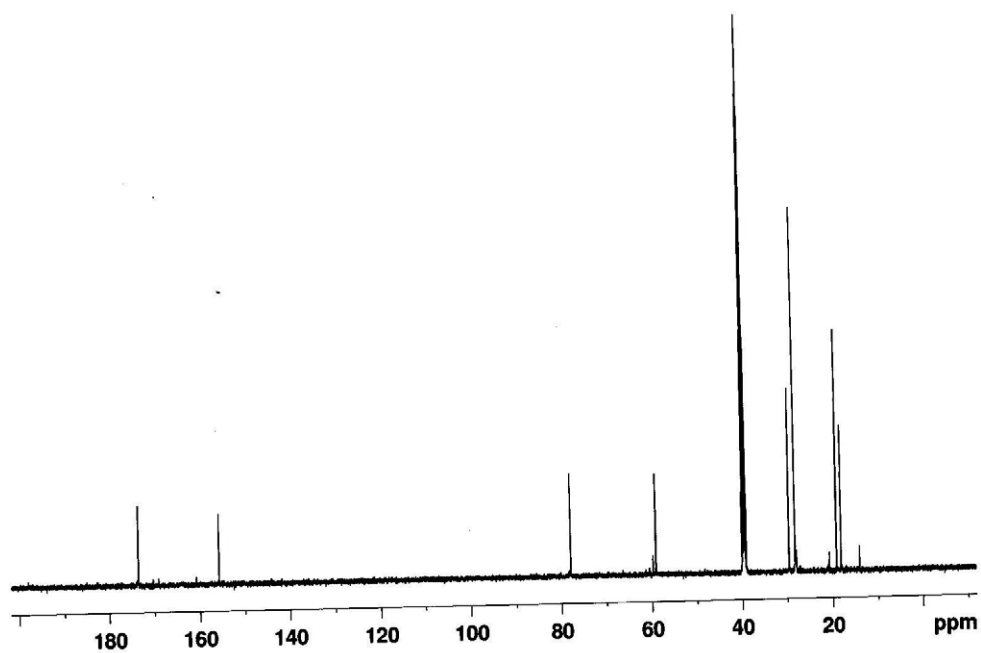

Figure S3:  $^{13}\text{C}$  NMR (125 MHz,  $\text{DMSO-}d_6$ ) spectra of Boc-Val(1)-OH 2.

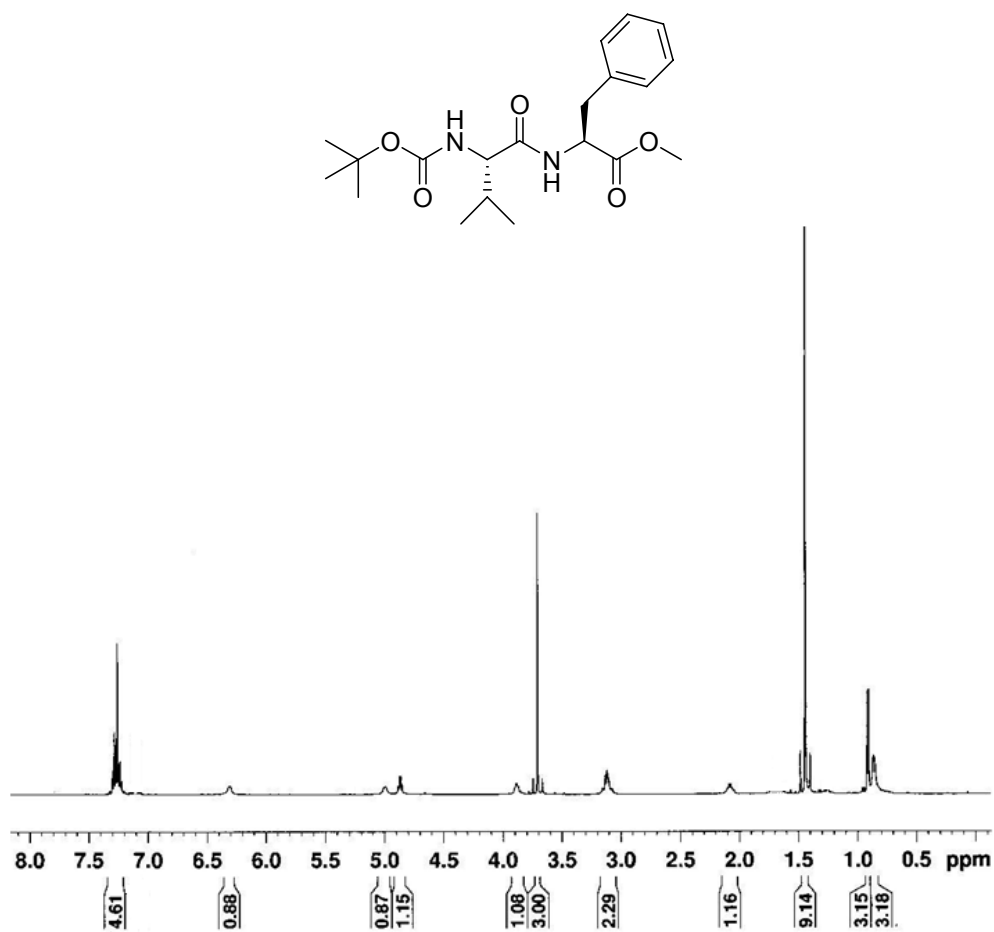

Figure S4: <sup>1</sup>H NMR (500 MHz, CDCl<sub>3</sub>) spectra of Boc-Val(1)-Phe(2)-OMe 1.

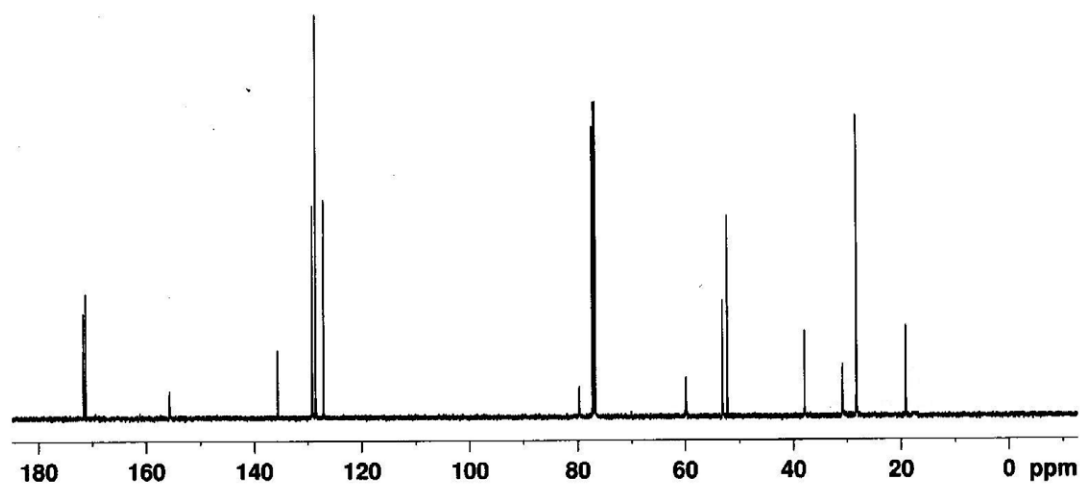

Figure S5: <sup>13</sup>C NMR (125 MHz, CDCl<sub>3</sub>) spectra of Boc-Val(1)-Phe(2)-OMe 1.

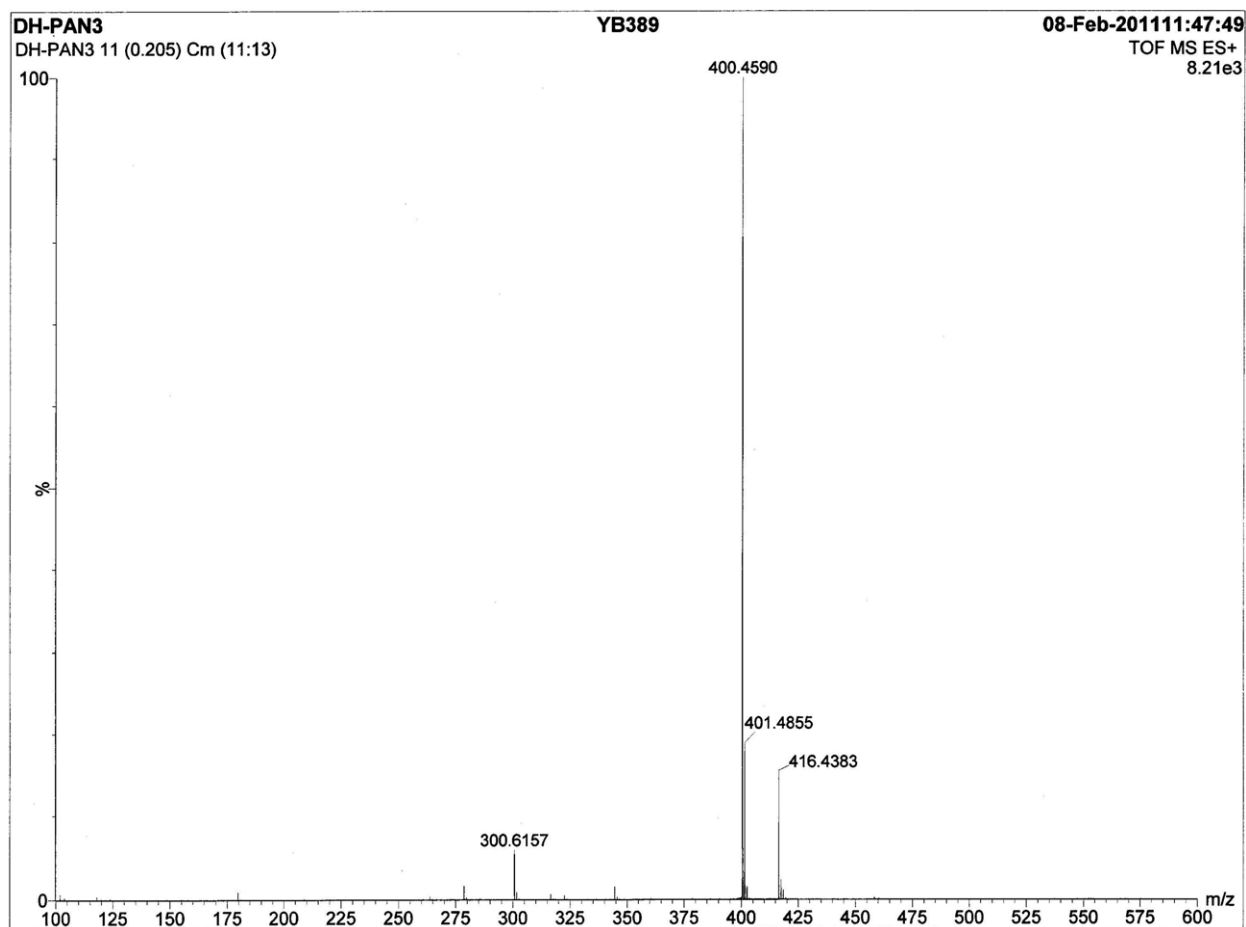

**Figure S6:** Mass spectra of Boc-Val-Phe-OMe 1.

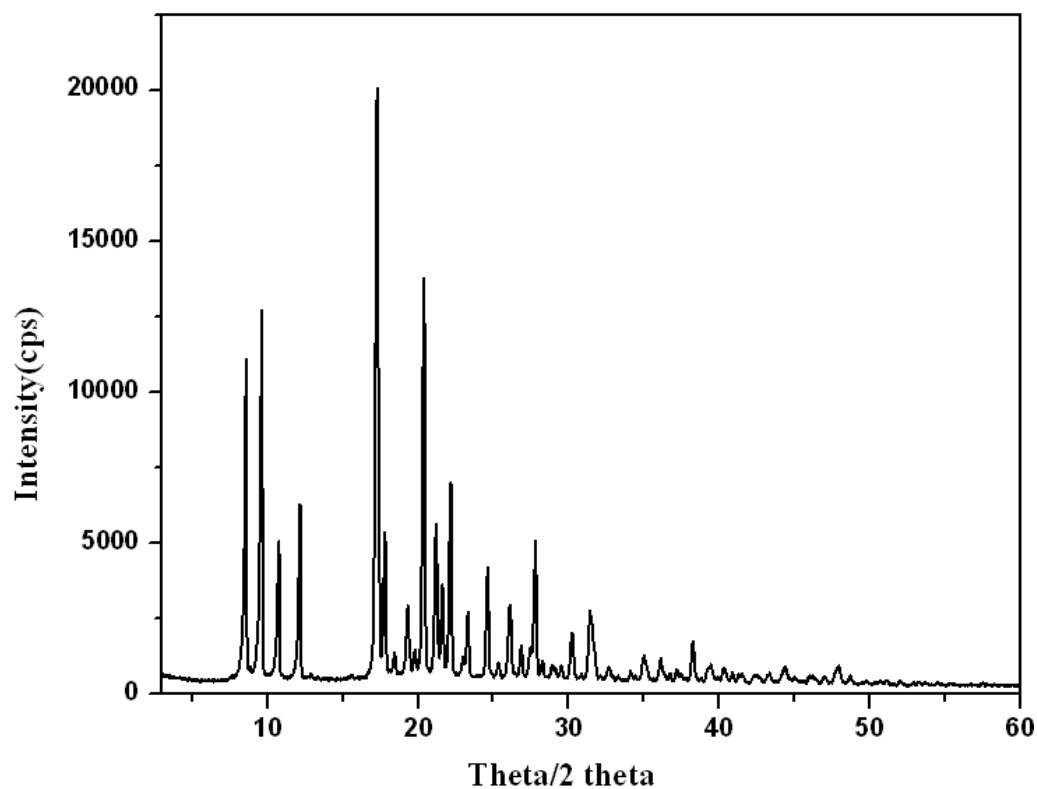

Figure S7: X-ray diffraction data obtained from Boc-Val-Phe-OMe 1 fibrils.

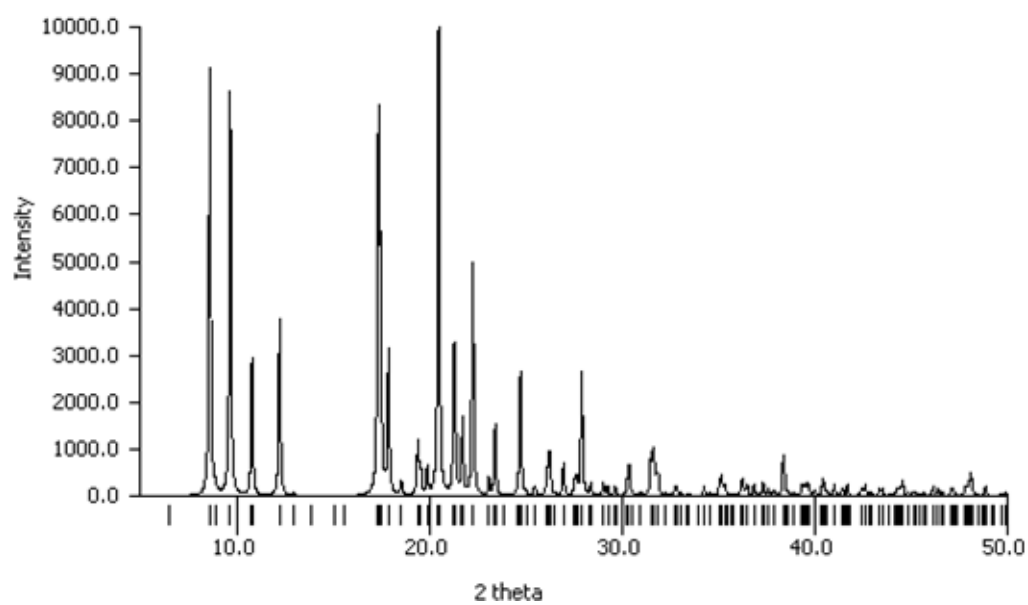

Figure S8: Powder pattern from X-ray crystallography of Boc-Val-Phe-OMe 1.
